# Supplementary material
Source: PubMed Central journal article supplement (PMC4864102)
Supplement: NIHMS776187-supplement-2.pdf [file NIHMS776187-supplement-2.pdf]

## Supplemental Figures and Legends

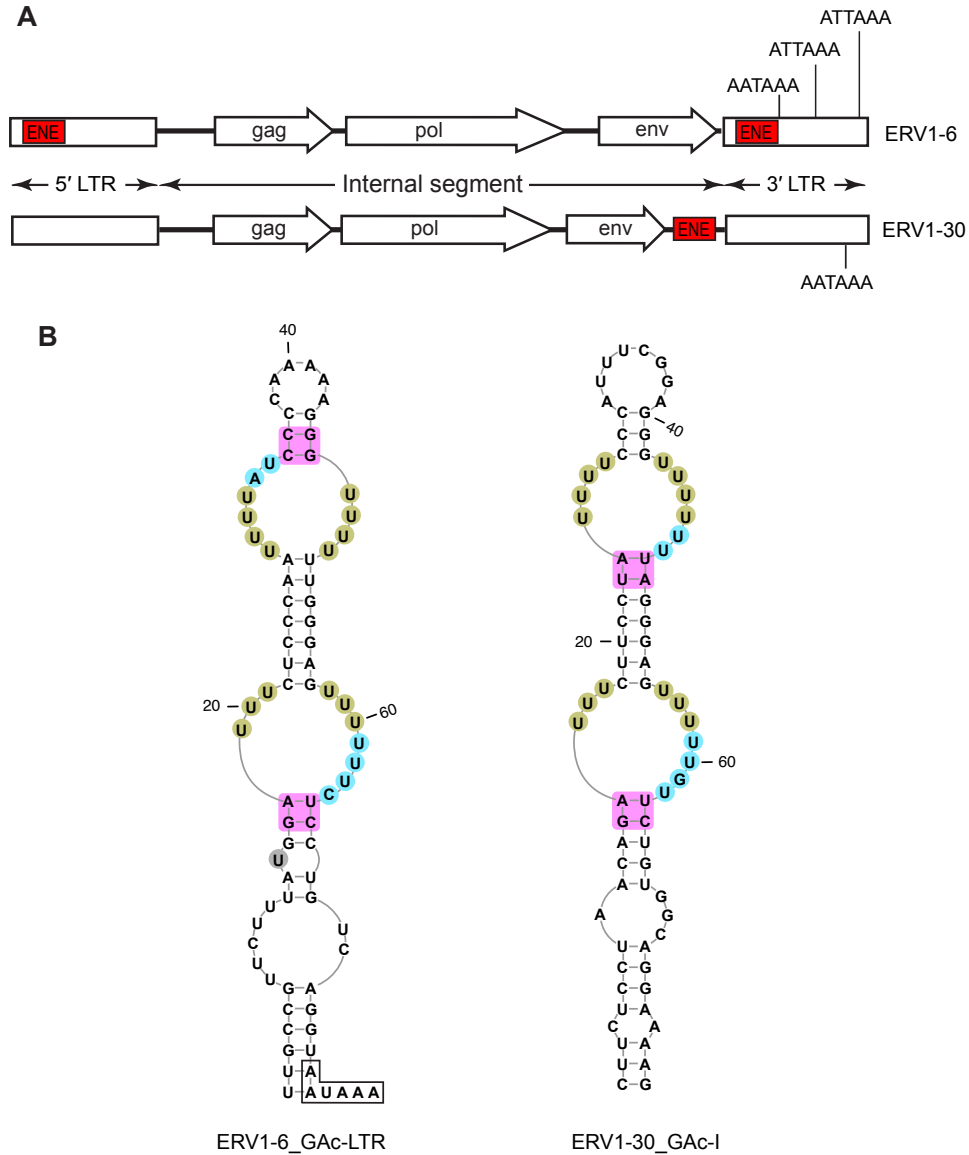

**Figure S1. ENEs identified in stickleback ERVs, Related to Figure 2**

(A) Schematic of two ERVs with the position of ENEs and possible polyadenylation signals shown. (B) Predicted secondary structures of stickleback ENEs. A polyadenylation signal in ERV1-6\_GAc-LTR is boxed. Nucleotide shading is as described in Figure 2.

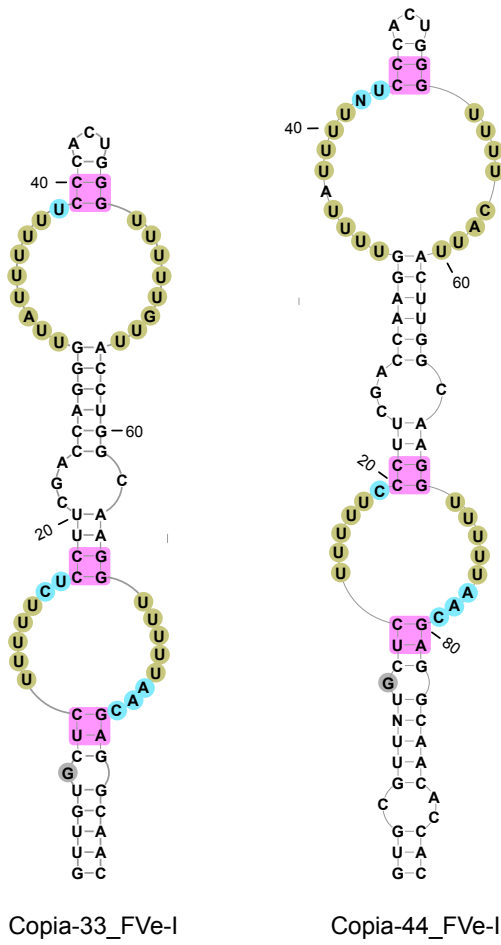

**Figure S2. *Fragaria* ENEs, Related to Figure 2**

Nucleotide shading is as described in Figure 2. Note that the upper domain of Copia-33\_FVe-I may form an A•A-G triple, while that of Copia-44\_FVe-I may include two noncanonical triples, U•A-C and U•A-A, with an A bulge.

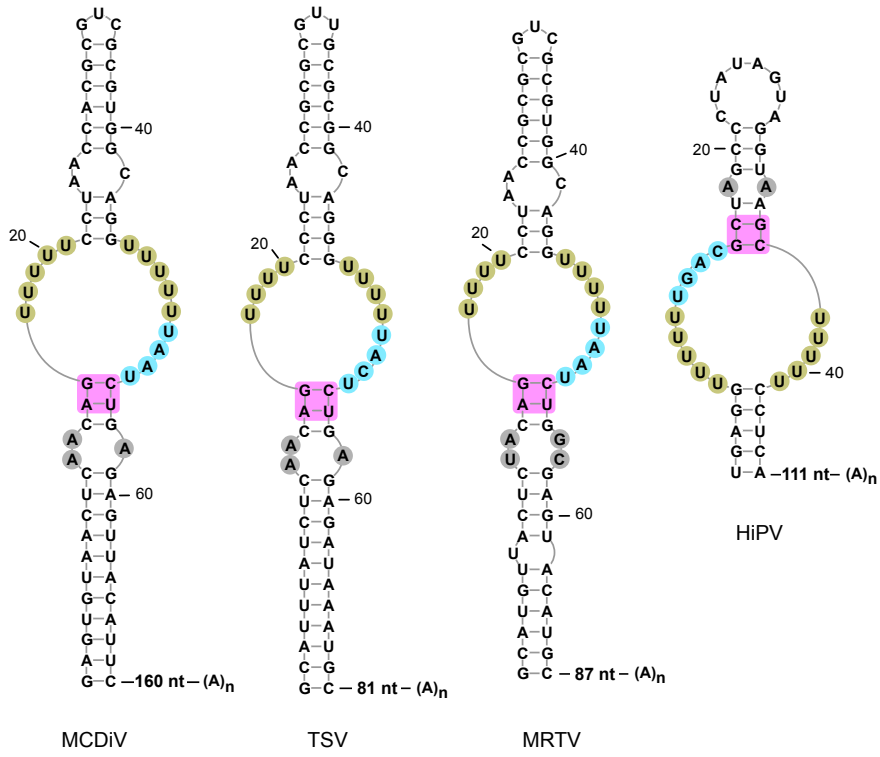

**Figure S3. ENes from Dicistroviruses, Related to Figure 3**  
 Nucleotide shading is as described in Figure 2.

## Supplemental Tables

**Table S1. hAT transposons included in the phylogenetic tree shown in Figure 7**

TEs with experimentally-demonstrated transposition activity are in bold.

| <b>TE name</b>  | <b>Organism</b>                 | <b>Evidence for introns in the transposase gene</b> | <b>References</b>                         |
|-----------------|---------------------------------|-----------------------------------------------------|-------------------------------------------|
| <b>Ac</b>       | <i>Zea mays</i>                 | cDNA sequencing                                     | (Kunze et al., 1987)                      |
| <b>Crypt1</b>   | <i>Cryphonectria parasitica</i> | RT-PCR                                              | (Linder-Basso et al., 2001)               |
| <b>Dart</b>     | <i>Oryza sativa</i>             | RT-PCR                                              | (Fujino et al., 2009; Smith et al., 2012) |
| <b>Folyt1</b>   | <i>Fusarium oxysporum</i>       | RT-PCR                                              | (Gomez-Gomez et al., 1999)                |
| <b>Mx</b>       | <i>Zea mays</i>                 | predicted                                           | (Xu and Dooner, 2005)                     |
| <i>restless</i> | <i>Tolypocladium inflatum</i>   | cDNA sequencing                                     | (Kempken and Kuck, 1996)                  |
| <b>Tag1</b>     | <i>Arabidopsis thaliana</i>     | cDNA sequencing                                     | (Liu and Crawford, 1998)                  |
| <b>Tag2</b>     | <i>Arabidopsis thaliana</i>     | cDNA sequencing                                     | (Henk et al., 1999)                       |
| <b>Tam3</b>     | <i>Antirrhinum majus</i>        | cDNA sequencing                                     | (Hehl et al., 1991)                       |
| <b>TCUP</b>     | <i>Zea mays</i>                 | RT-PCR                                              | (Smith et al., 2012)                      |
| <b>Thelma13</b> | <i>Silene latifolia</i>         | cDNA sequencing                                     | (Pritham et al., 2003)                    |
| Br1             | <i>Brassica rapa</i>            | Bioinformatics prediction                           | This paper                                |
| hAT-3           | <i>Sorghum bicolor</i>          | Bioinformatics prediction                           | This paper                                |
| ZhAT3           | <i>Zea mays</i>                 | Bioinformatics prediction                           | This paper                                |
| hAT-15          | <i>Zea mays</i>                 | Bioinformatics prediction                           | This paper                                |
| Mn1             | <i>Morus notabilis</i>          | Bioinformatics prediction                           | This paper                                |
| Si1             | <i>Setaria italica</i>          | Bioinformatics prediction                           | This paper                                |
| TWIFB1          | <i>Oryza sativa</i>             | EST-based annotation                                | (Itoh et al., 2007)                       |
| TWIFBIG         | <i>Oryza sativa</i>             | Bioinformatics prediction                           | This paper                                |

## Supplemental References

Fujino, K., Matsuda, Y., and Sekiguchi, H. (2009). Transcriptional activity of rice autonomous transposable element Dart. *J. Plant Physiol.* *166*, 1537-1543.

Gomez-Gomez, E., Anaya, N., Roncero, M.I., and Hera, C. (1999). Folyt1, a new member of the hAT family, is active in the genome of the plant pathogen *Fusarium oxysporum*. *Fungal Genet. Biol.* *27*, 67-76.

Hehl, R., Nacken, W.K., Krause, A., Saedler, H., and Sommer, H. (1991). Structural analysis of Tam3, a transposable element from *Antirrhinum majus*, reveals homologies to the Ac element from maize. *Plant Mol. Biol.* *16*, 369-371.

Henk, A.D., Warren, R.F., and Innes, R.W. (1999). A new Ac-like transposon of *Arabidopsis* is associated with a deletion of the RPS5 disease resistance gene. *Genetics* *151*, 1581-1589.

Itoh, T., Tanaka, T., Barrero, R.A., Yamasaki, C., Fujii, Y., Hilton, P.B., Antonio, B.A., Aono, H., Apweiler, R., Bruskiewich, R., Bureau, T., Burr, F., Costa de Oliveira, A., Fuks, G., Habara, T., *et al.* (2007). Curated genome annotation of *Oryza sativa* ssp. *japonica* and comparative genome analysis with *Arabidopsis thaliana*. *Genome Res.* *17*, 175-183.

Kempken, F., and Kuck, U. (1996). restless, an active Ac-like transposon from the fungus *Tolypocladium inflatum*: structure, expression, and alternative RNA splicing. *Mol. Cell. Biol.* *16*, 6563-6572.

Kunze, R., Stochaj, U., Laufs, J., and Starlinger, P. (1987). Transcription of transposable element Activator (Ac) of *Zea mays* L. *EMBO J.* *6*, 1555-1563.

Linder-Basso, D., Foglia, R., Zhu, P., and Hillman, B.I. (2001). Crypt1, an active Ac-like transposon from the chestnut blight fungus, *Cryphonectria parasitica*. *Mol. Genet. Genomics* *265*, 730-738.

Liu, D., and Crawford, N.M. (1998). Characterization of the putative transposase mRNA of Tag1, which is ubiquitously expressed in *Arabidopsis* and can be induced by *Agrobacterium*-mediated transformation with dTag1 DNA. *Genetics* *149*, 693-701.

Pritham, E.J., Zhang, Y.H., Feschotte, C., and Kesseli, R.V. (2003). An Ac-like transposable element family with transcriptionally active Y-linked copies in the white campion, *Silene latifolia*. *Genetics* *165*, 799-807.

Smith, A.M., Hansey, C.N., and Kaeppler, S.M. (2012). TCUP: a novel hAT transposon active in maize tissue culture. *Front. Plant Sci.* *3*, 6.

Xu, Z., and Dooner, H.K. (2005). Mx-rMx, a family of interacting transposons in the growing hAT superfamily of maize. *Plant Cell* *17*, 375-388.
